# Supplementary material
Source: PubMed Central journal article supplement (PMC2900446)
Supplement: NIHMS194265-supplement-01.pdf [file NIHMS194265-supplement-01.pdf]

467 **Figure 4.** Body weights of mice treated with MTM, MTM-SDK and MTM-SK. Healthy  
468 female CD-1 mice (4 per group) were treated with i.p. injections of 400 µg/Kg/day x15 (6  
469 mg/Kg total). The control group received an equivalent amount of DMSO. Each point  
470 represents the mean ± SD of 4 mice.

471

472 **Figure 5.** Antitumor activity of MTM-SDK and MTM-SK in subcutaneous ovarian tumor  
473 xenograft. Mice (10 per group) were inoculated with A2780 cells and treated with 600  
474 µg/Kg, q2d x10, or vehicle (DMSO) given by intraperitoneal injections over a 20-day period.

475 (A) Tumor size was measured twice weekly. Results are expressed as mean ± SD of 10 mice.  
476 Difference in tumor size is statistically significant after 10 days of treatment (\*\* P <0.05). (B)  
477 Body weight was measured twice weekly. Data are presented as relative body weight, i.e., the  
478 difference between mean body weight at start of the treatment and at the indicated time  
479 points.

480

481 **Figure 6.** Antitumor activity of MTM SDK, MTM SK and MTM in orthotopic ovarian tumor  
482 xenografts. Mice (10 per group) were inoculated intraperitoneally with A2780 cells and  
483 treatment started 7 days later. Vehicle or compounds (400 µg/Kg/day) were given by  
484 intraperitoneal injections for 10 days. (A) Kaplan-Meier survival curves. (B) Abdominal  
485 distension and intraperitoneal tumor masses (*arrows*) in representative mice of the control  
486 (*left*) and MTM-SDK (*right*) group sacrificed at day 50 from cell implant.

487

488 **Supplementary Table S1.** Genes and primer sets for gene expression analysis by real-time  
489 RT-PCR.

490

**Supplementary Table (S1).**

| <b>Gene name</b> | <b>mRNA accession number</b> | <b>qPCR primer forward</b> | <b>qPCR primer reverse</b> |
|------------------|------------------------------|----------------------------|----------------------------|
| GAPDH            | NM_002046.3                  | ccatgttcgcatgggtgt         | ccaggggtgctaagcagtt        |
| B2M              | NM_004048.2                  | ttctggcctggaggctatc        | tcaggaaattgactttcattc      |
| C-SRC            | NM_198291.1                  | cgagaaagtgagaccacgaa       | ttggcgttgctgaagtca         |
| VEGFA            | NM_001033756.1               | agtgtgtgccactgagga         | ggtgaggttgatccgcata        |
| MYC              | NM_002467.3                  | tgctccatgaggagacacc        | ctttccacagaaacaacatcg      |
| hTERT            | NM_198255.2                  | gcctcaagagccacgtc          | ccacgaactgtcgcattg         |
| CCNE1            | NM_001238.1                  | cctcggattattgcaccatc       | cctctctattgcccagctc        |
| CLDN4            | NM_001305.3                  | gactgagccaggcaggaa         | ttgggaagttgtccgagtg        |
| BIRC5            | NM_001168.2                  | agaactggcccttcttga         | caagtctggctcgttctcagt      |
| XIAP             | NM_001167.2                  | ttttgggacatggatatactcagtt  | agcactttactttatcaccttcacc  |
| KLF8             | NM_007250.3                  | tcaccgcagaatccatacag       | tgagcgagcaaatttcag         |
